# Supplementary material for: Effects of Various Marine Toxins on the Mouse Intestine Organoid Model
Source: MDPI journal article supplement (doi:10.3390/toxins14120829), 2022-11-24
Supplement: s1 [file s1]

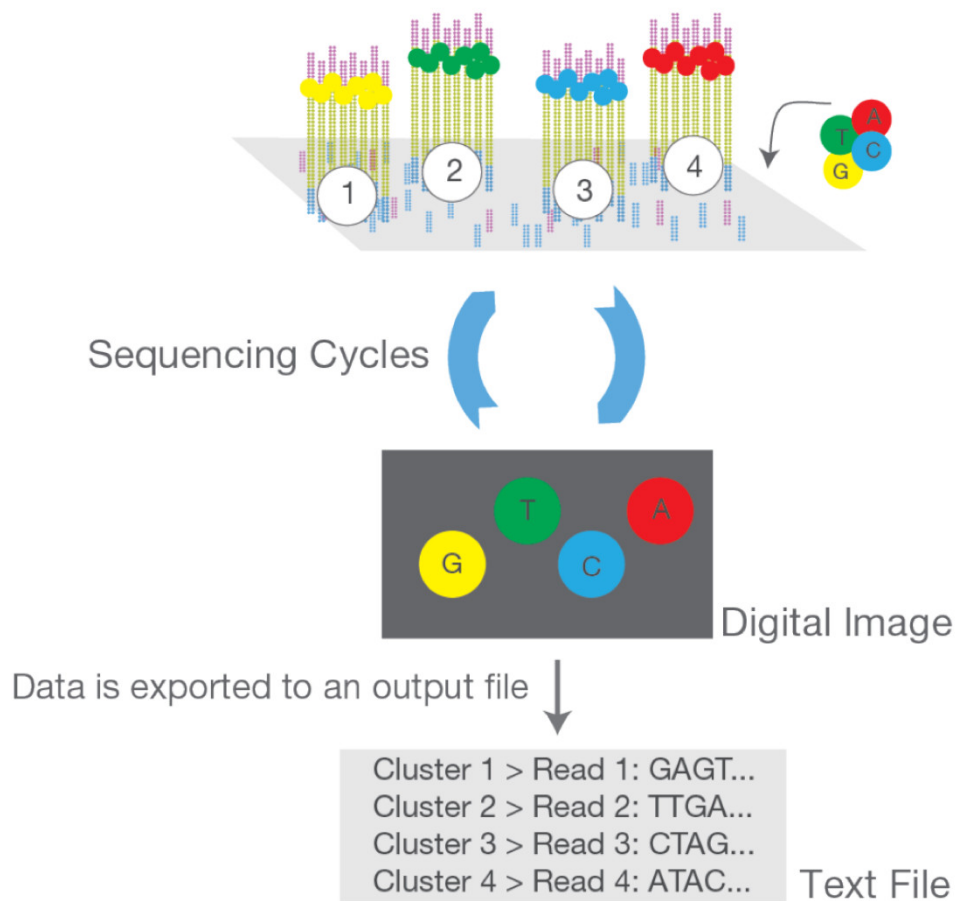

**Figure S1.** Sequencing process flow chart.

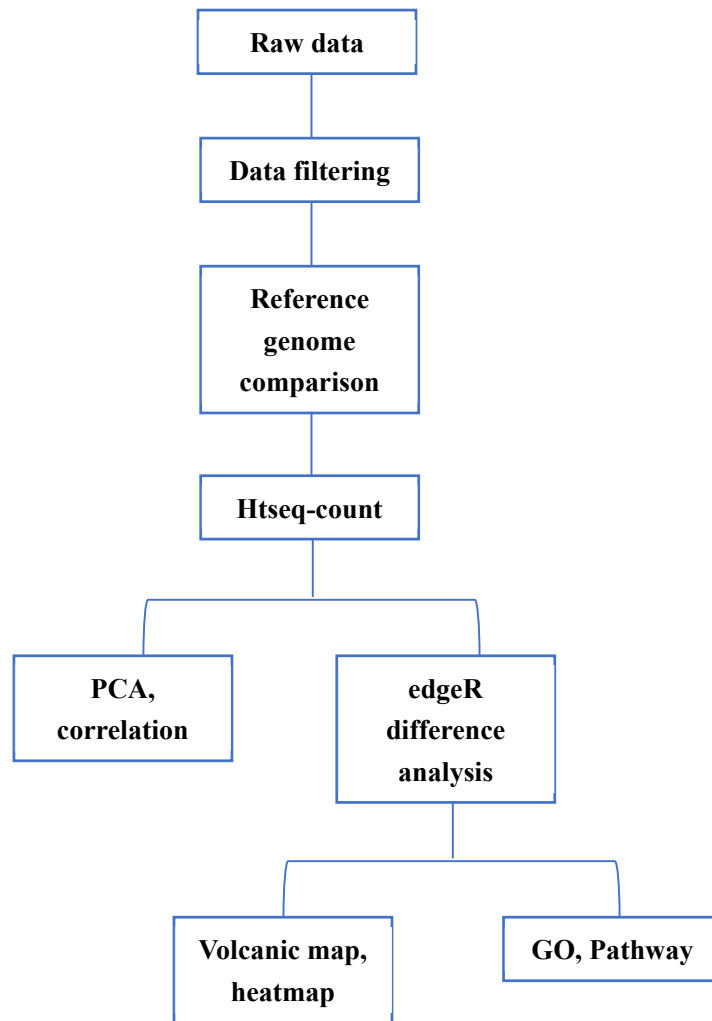

**Figure S2.** Data analysis flow chart. The analysis process of RNA-seq raw data.

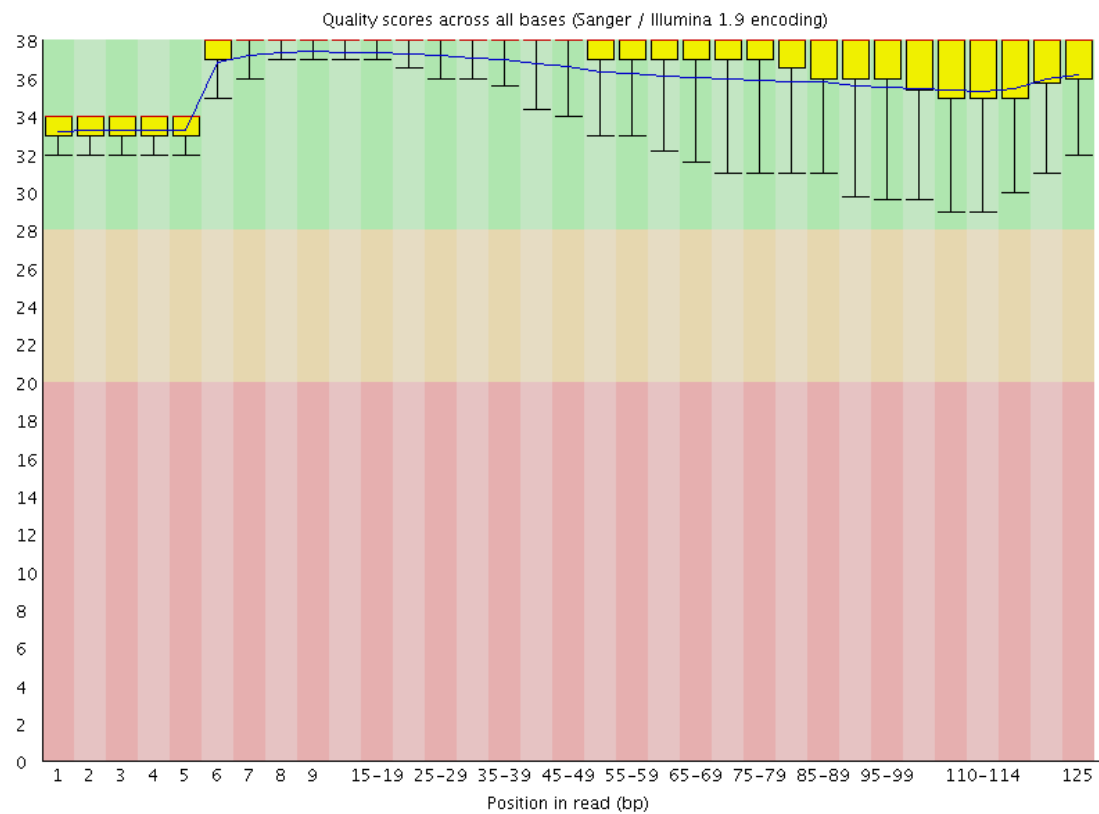

**Figure S3.** Data Q-value box chart (Box-plot): a box chart is a statistical chart purposed to show the distribution of data. The Q-value box chart is the quality quantile chart. The lowest edge of the yellow rectangle is the Q-value 1/4 quantile, while the upper and lower black lines account for 3/4 of the corresponding quality values, respectively. The blue lines represent the average value of the mass. Different background colors indicate the quality of this part, the green background represents the high quality value part, the orange background indicates the reasonable quality value part, and the red background represents the low quality value part.



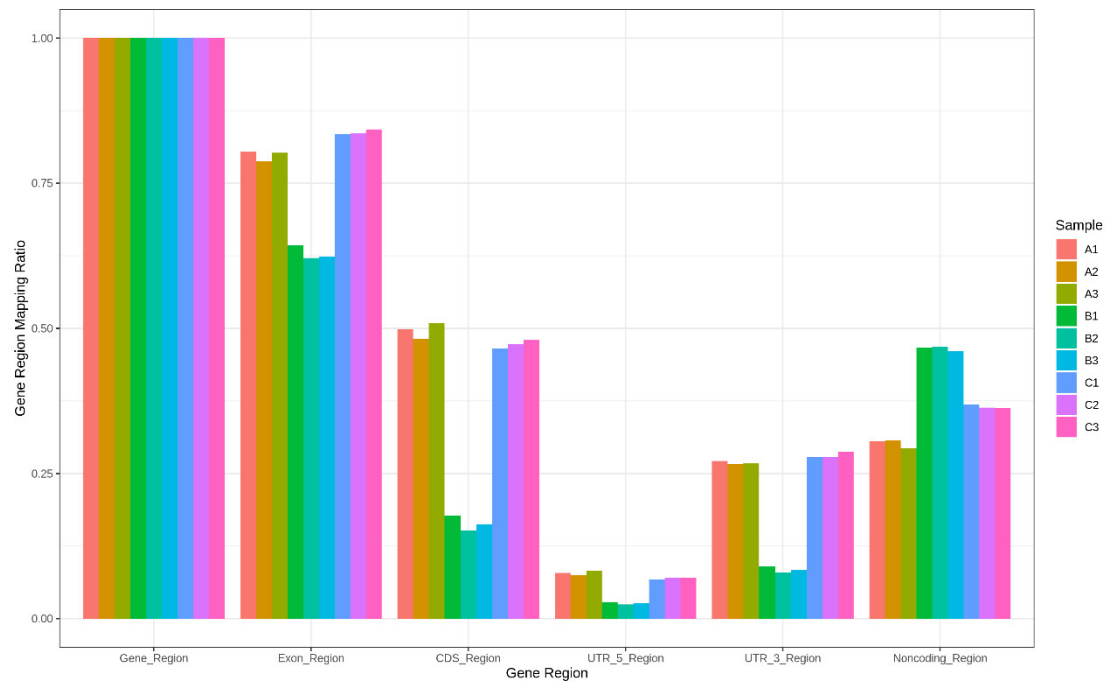

**Figure S6.** Mapping region comparison of regional distribution. The distribution to different regions of the genome, including gene region, exon region, coding region, 5'UTR region, 3'UTR region and non-coding region.

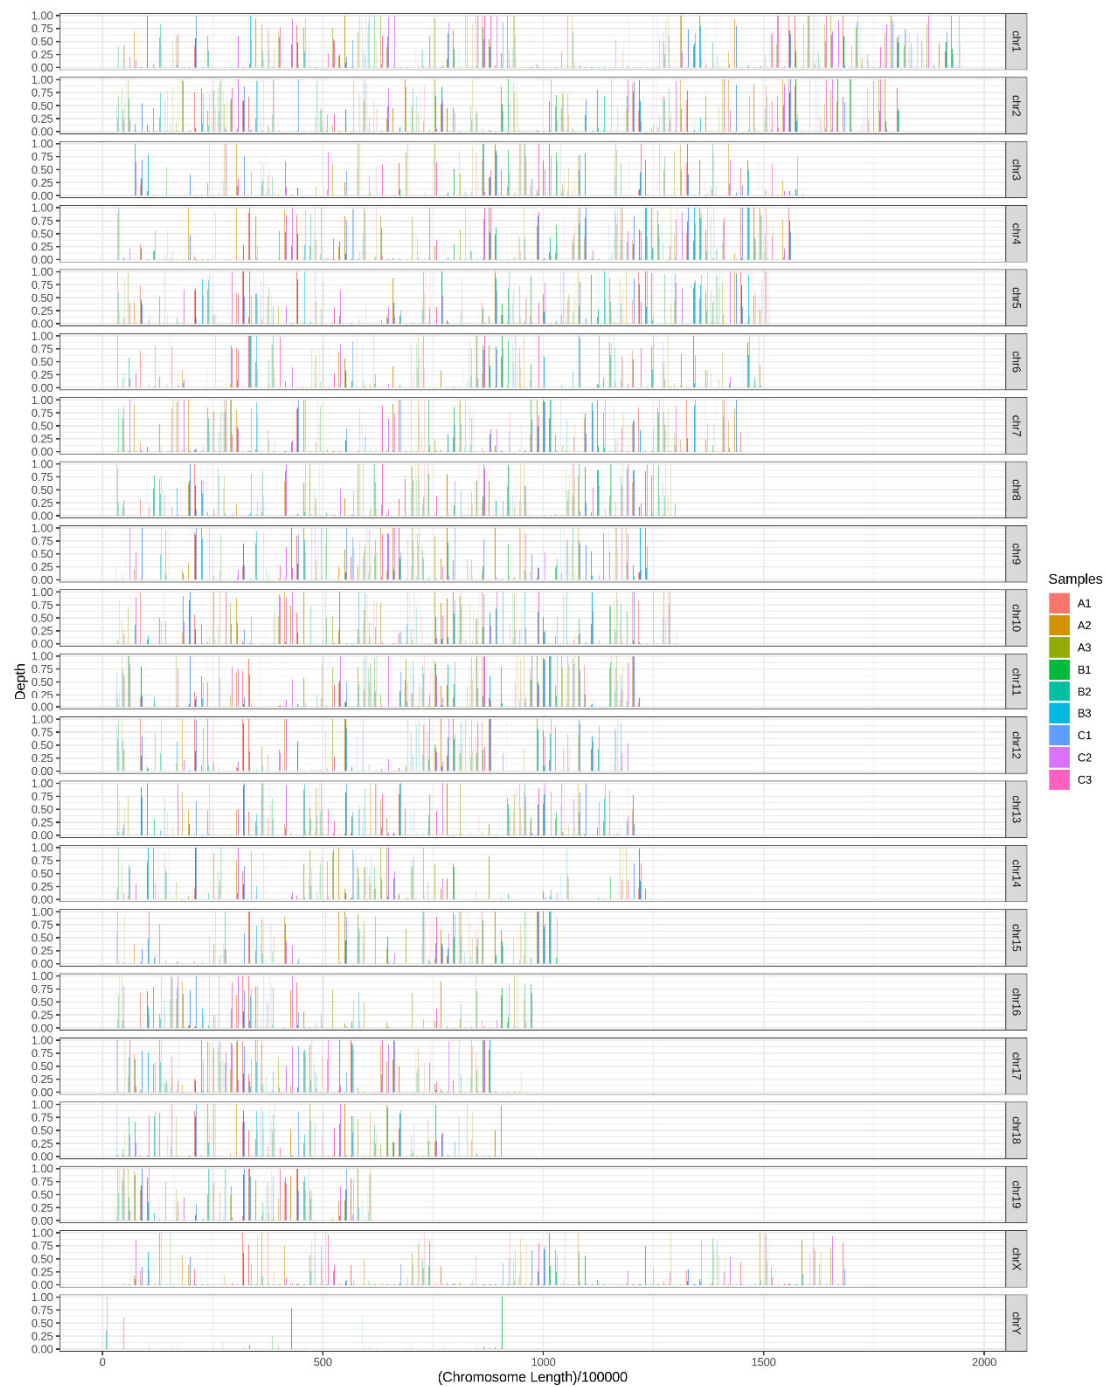

**Figure S7.** Mapping region genome coverage map. Genome coverage map uses bedtools to calculate the average sequencing coverage and depth of the sequence.

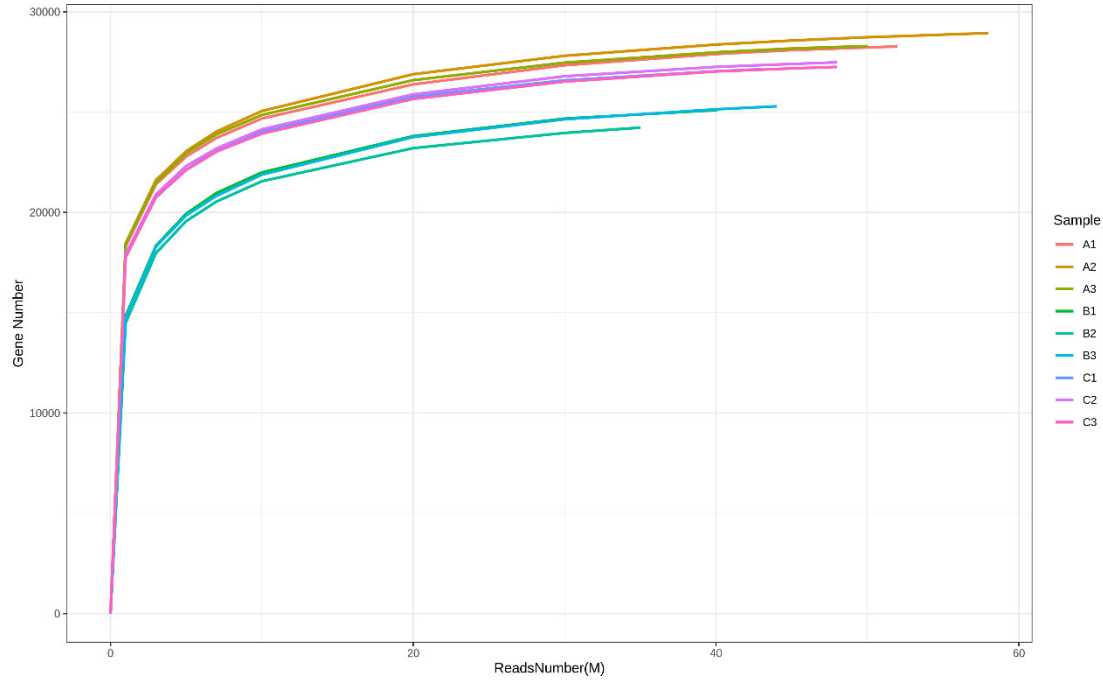

**Figure S8.** Mapping region saturation analysis. According to the result of data analysis, the number of sequencing (the number of reads) and genome coverage increases exponentially, and then a certain proportion is approached to show saturation. This phenomenon was revealed by saturation analysis. In general, saturation analysis can be conducted to evaluate whether the amount of sequencing data is sufficient.

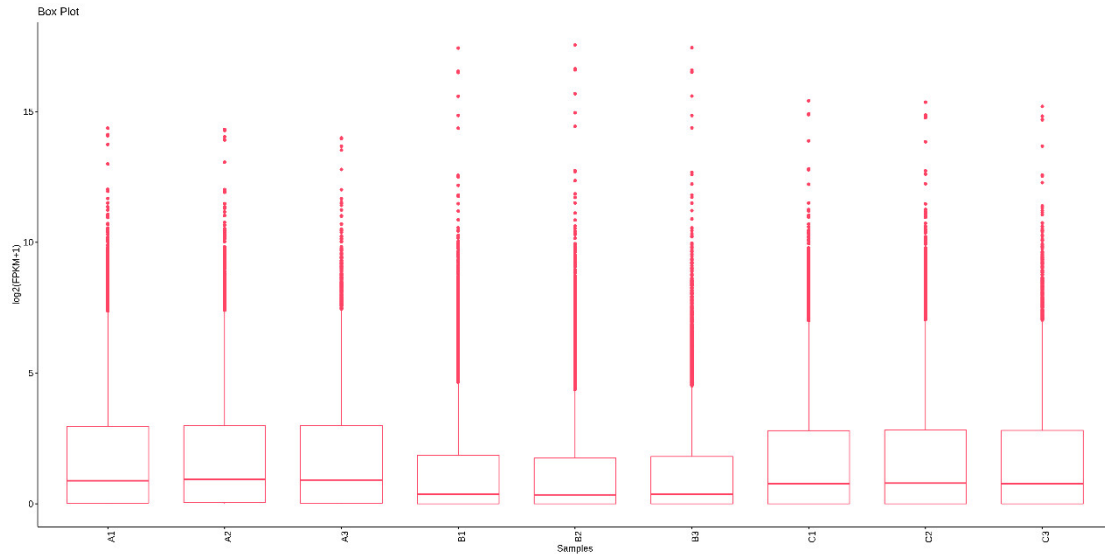

**Figure S9.** Gene expression boxplot. The box map of all gene expression values (FPKM) of each sample was built to show the distribution of gene expression levels in different samples, where the Abscissa is the sample name and the ordinate is  $\log_2(\text{FPKM}+1)$ . The box chart is composed of quartile, the maximum, the upper quartile, the median, the lower quartile and the minimum from top to bottom. The two ends of the box diagram rectangle box correspond to the upper and lower quartile (Q3 and Q1) respectively. The internal median corresponds to the median line, the upper line is  $Q1+1.5\text{IQR}$ , the underline is  $Q3-1.5\text{IQR}$ , where IQR (InterQuantileRange) represents the middle quartile range, and

IQR=Q3-Q1.

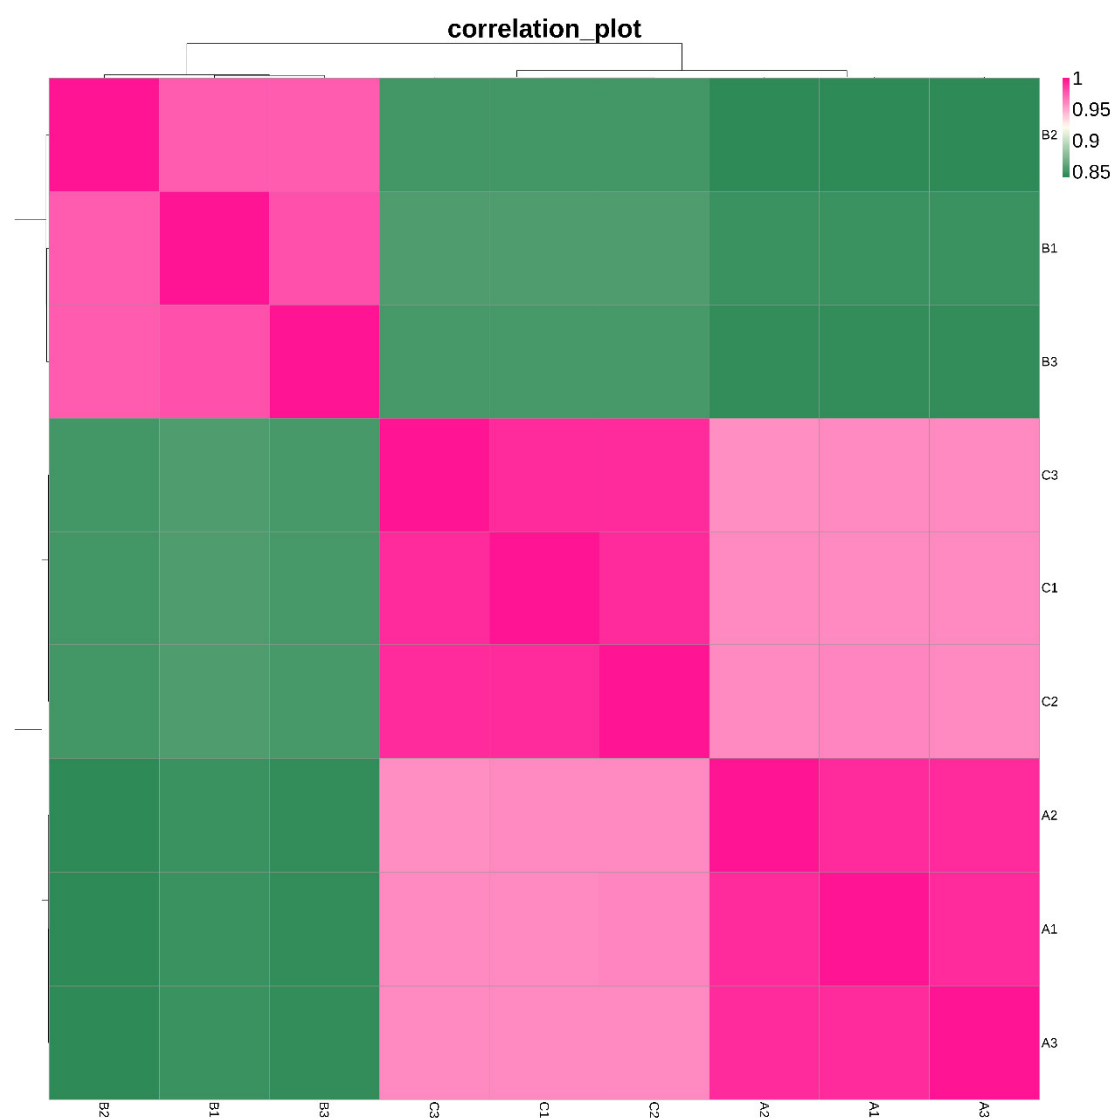

**Figure S10.** Correlation. The Pearson correlation coefficient of each sample was calculated and visualized to show the repeatability between groups, such as the log2 processing of data standardized.



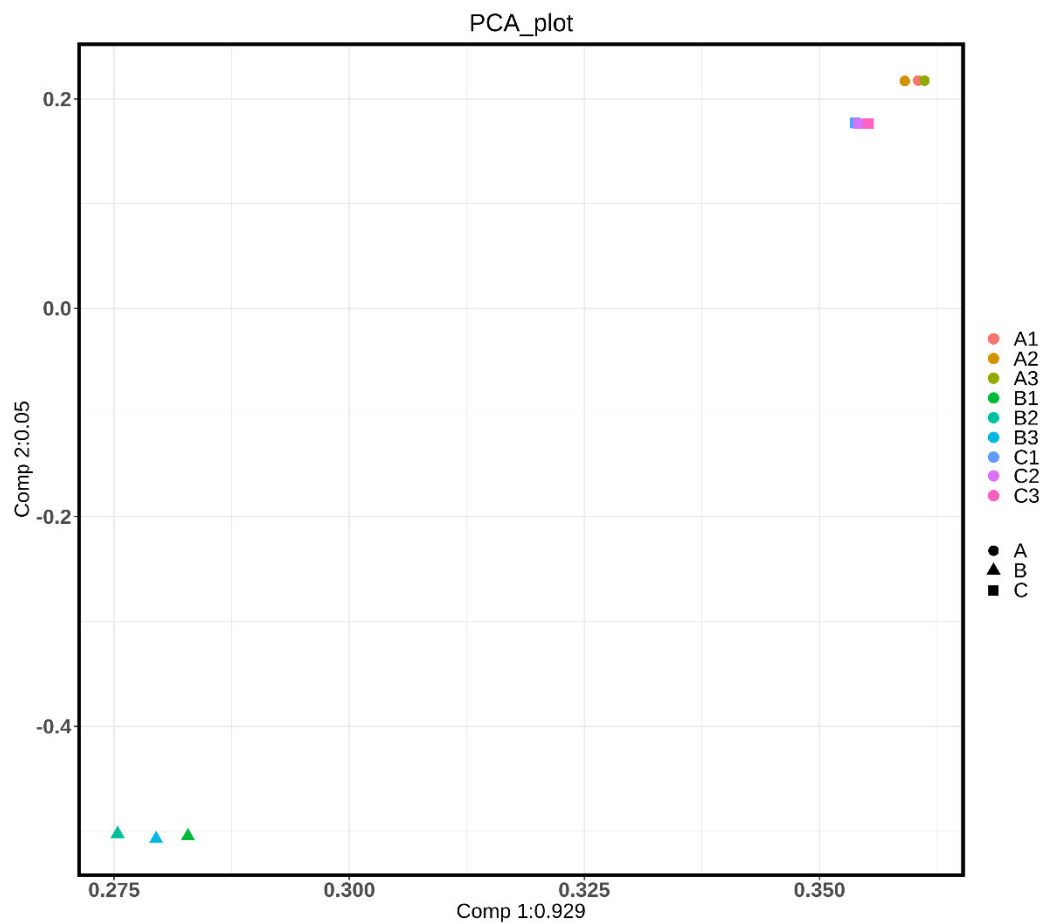

**Figure S11.** PCA. Based on FPKM method, the dimensionality reduction of data was performed by PCA unsupervised algorithm, and visualization was carried out to present the repeatability between groups.

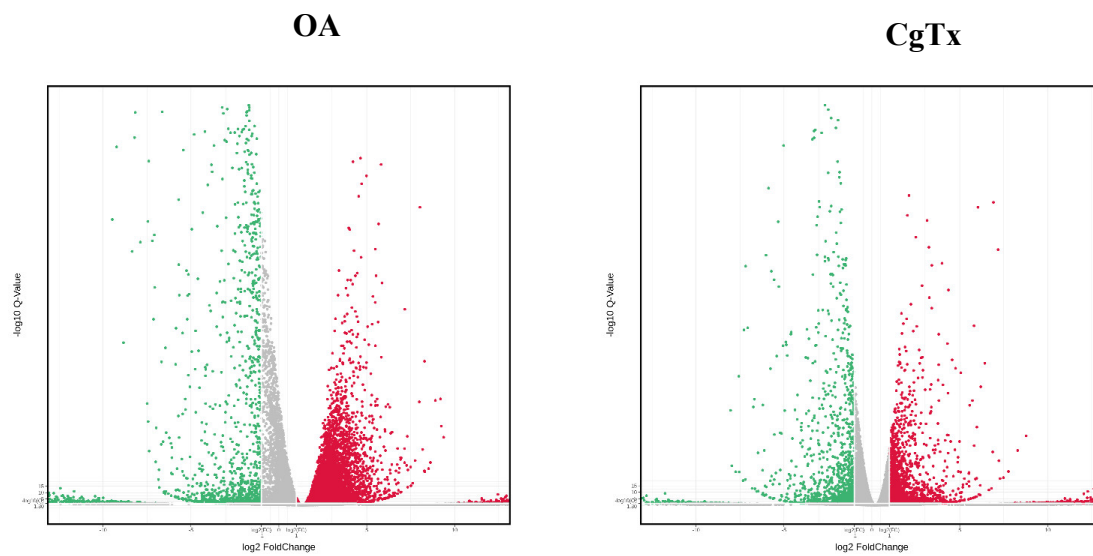

**Figure S12.** Volcanic map. The difference mRNA was visualized.

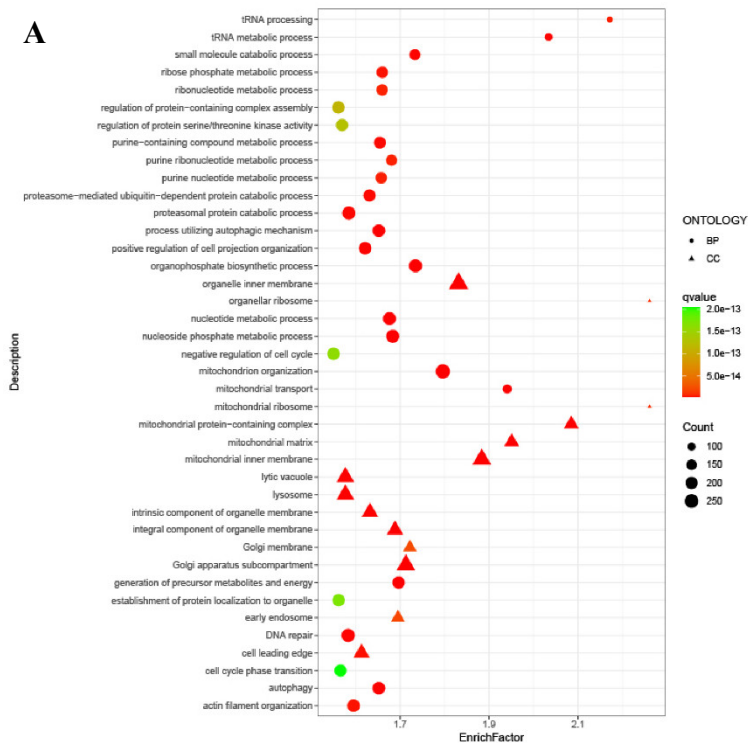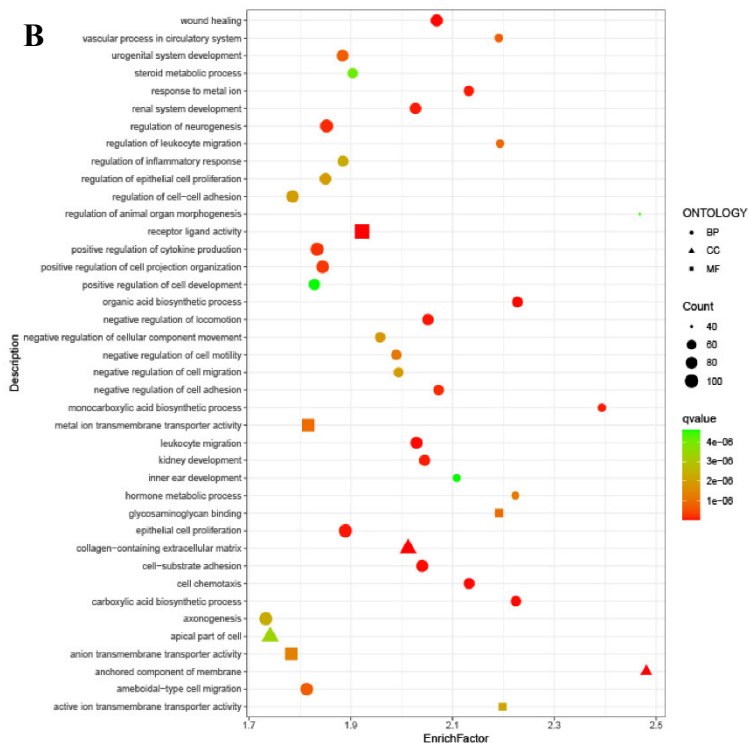

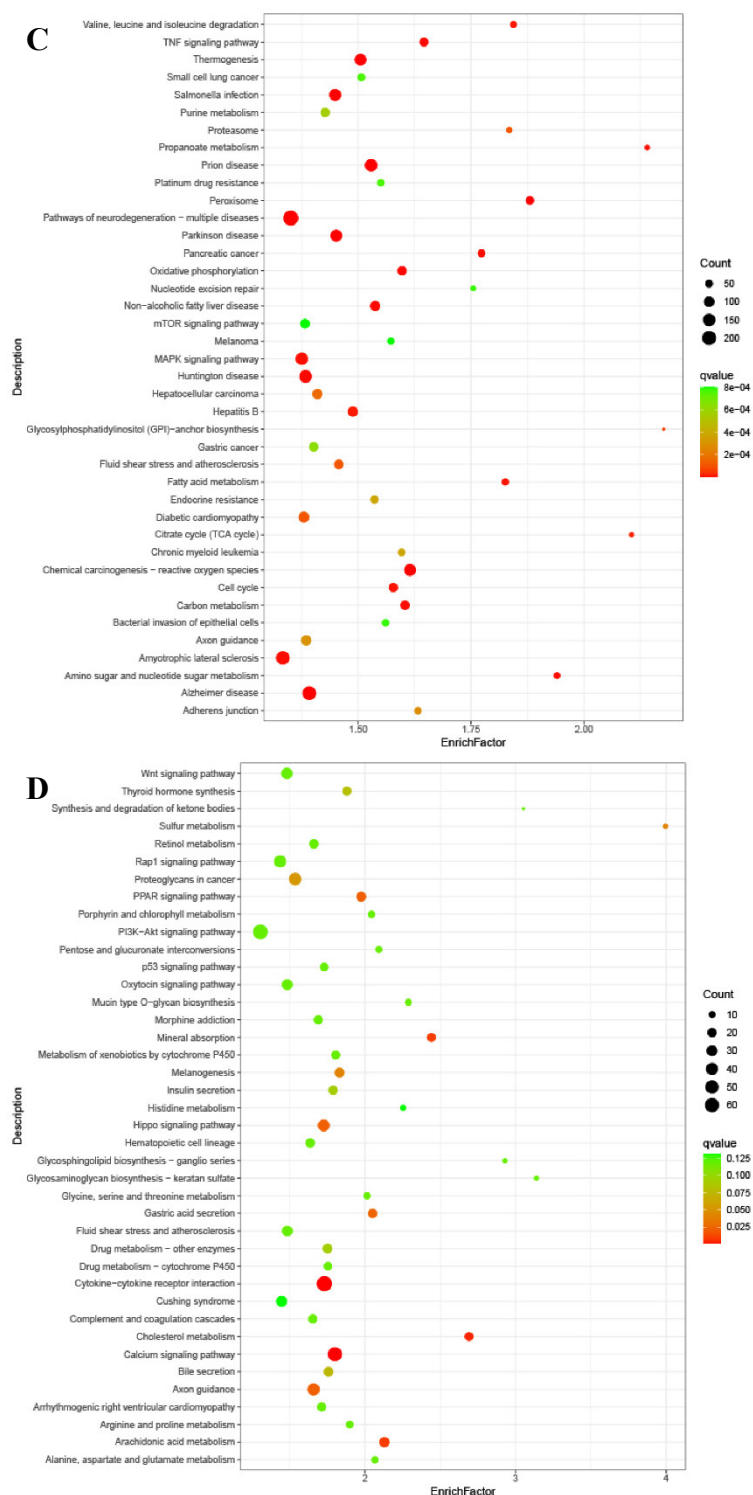

**Figure S13.** Mouse intestinal organoids were subcultured for 14 days, the differential miRNA target genes were analysed by GO and pathway with the assistance of R packet. GO refers to the international standard classification system of gene function. GO consists of three parts: molecular function, biological process and cellular composition. Through GO enrichment analysis, it is possible to identify not only the important function that leads to the change of traits but also the corresponding genes. KEGG is the bioinformatics resource required to understand biological functions from a genomic perspective. As a multispecies, integrated resource consisting of genomics, chemistry and network

information, it cross-references a number of external databases, including a complete set of construction modules and wiring diagrams to represent cell functions, A and 2 days after adding OA, the concentration was 5  $\mu$ M, GO analysis; B 2 days after adding CgTx, the concentration was 4  $\mu$ M, GO analysis; mouse intestinal organoids were subcultured for 14 days, C 2 days after adding OA, the concentration was 5  $\mu$ M, KEGG analysis; D 2 days after adding CgTx, the concentration was 4  $\mu$ M, KEGG analysis.

## GSEA Report for Dataset B\_VS\_A\_data

### Enrichment in phenotype: B (3 samples)

- 753 / 1948 gene sets are upregulated in phenotype **B**
- 0 gene sets are significant at FDR < 25%
- 42 gene sets are significantly enriched at nominal pvalue < 1%
- 42 gene sets are significantly enriched at nominal pvalue < 5%
- [Snapshot](#) of enrichment results
- Detailed [enrichment results in html](#) format
- Detailed [enrichment results in TSV](#) format (tab delimited text)
- [Guide to](#) interpret results

### Enrichment in phenotype: A (3 samples)

- 1195 / 1948 gene sets are upregulated in phenotype **A**
- 8 gene sets are significantly enriched at FDR < 25%
- 140 gene sets are significantly enriched at nominal pvalue < 1%
- 140 gene sets are significantly enriched at nominal pvalue < 5%
- [Snapshot](#) of enrichment results
- Detailed [enrichment results in html](#) format
- Detailed [enrichment results in TSV](#) format (tab delimited text)
- [Guide to](#) interpret results

### Dataset details

- The dataset has 7970 features (genes)
- No probe set => gene symbol collapsing was requested, so all 7970 features were used

### Gene set details

- Gene set size filters (min=5, max=10000) resulted in filtering out 284 / 2232 gene sets
- The remaining 1948 gene sets were used in the analysis
- List of [gene sets used and their sizes](#) (restricted to features in the specified dataset)

### Gene markers for the B versus A comparison

**Figure S14.** The differential genes of OA vs\_Control were analyzed by pathway, and the related pathways of differential genes were predicted. According to the enrichment analysis, the method adopted was fisher accurate inspection, and the data packet was clusterProfiler, from R/bioconductor.

## GSEA Report for Dataset C\_VS\_A\_data

### Enrichment in phenotype: C (3 samples)

- 560 / 1151 gene sets are upregulated in phenotype **C**
- 0 gene sets are significant at FDR < 25%
- 65 gene sets are significantly enriched at nominal pvalue < 1%
- 65 gene sets are significantly enriched at nominal pvalue < 5%
- [Snapshot](#) of enrichment results
- Detailed [enrichment results in html](#) format
- Detailed [enrichment results in TSV](#) format (tab delimited text)
- [Guide to](#) interpret results

### Enrichment in phenotype: A (3 samples)

- 591 / 1151 gene sets are upregulated in phenotype **A**
- 1 gene sets are significant at FDR < 25%
- 45 gene sets are significantly enriched at nominal pvalue < 1%
- 45 gene sets are significantly enriched at nominal pvalue < 5%
- [Snapshot](#) of enrichment results
- Detailed [enrichment results in html](#) format
- Detailed [enrichment results in TSV](#) format (tab delimited text)
- [Guide to](#) interpret results

### Dataset details

- The dataset has 2985 features (genes)
- No probe set => gene symbol collapsing was requested, so all 2985 features were used

### Gene set details

- Gene set size filters (min=5, max=10000) resulted in filtering out 1081 / 2232 gene sets
- The remaining 1151 gene sets were used in the analysis
- List of [gene sets used and their sizes](#) (restricted to features in the specified dataset)

### Gene markers for the C versus A comparison

**Figure S15.** The differential genes of CgTx vs\_Control were analyzed by pathway, and the related pathways of differential genes were predicted. According to the enrichment analysis, the method adopted was fisher accurate inspection, and the data packet was clusterProfiler, from R/bioconductor.

**Table S1.** Sequencing data quantity and quality control.

| ##   | External sample number | data output ( Gb) | Reads ( M) | Q30 ( %) |
|------|------------------------|-------------------|------------|----------|
| ## 1 | 22026-7-B2             | 6.493             | 43.29      | 90.69    |
| ## 2 | 22026-7-B3             | 8.057             | 53.71      | 91.32    |
| ## 3 | 22026-7-B1             | 7.343             | 48.95      | 91.09    |
| ## 4 | 22026-7-A1             | 8.51              | 56.73      | 93.91    |
| ## 5 | 22026-7-A2             | 9.726             | 64.84      | 93.65    |
| ## 6 | 22026-7-A3             | 8.179             | 54.53      | 93.76    |
| ## 7 | 22026-7-C1             | 7.176             | 47.85      | 93.77    |
| ## 8 | 22026-7-C2             | 7.984             | 53.23      | 93.68    |
| ## 9 | 22026-7-C3             | 8.273             | 55.16      | 94.09    |

**Table S2.** Quality and error rate comparison table.

| ##   | Error rate of Phred score sequencing (E) | Q value   |
|------|------------------------------------------|-----------|
| ## 1 | 10                                       | 10% Q10   |
| ## 2 | 20                                       | 1% Q20    |
| ## 3 | 30                                       | 0.10% Q30 |
| ## 4 | 40(max Q)                                | 0.01% Q40 |

**Table S3.** Statistical results after data filtering.

| ##   | Sample | RawReads   | CleanReads | CleanRatio | rmrRNAreads | rRNA_Ratio |
|------|--------|------------|------------|------------|-------------|------------|
| ## 1 | A1     | 56,733,672 | 56,629,286 | 99.82%     | 56,520,858  | 0.19%      |
| ## 2 | A2     | 64,842,264 | 64,714,004 | 99.8%      | 64,606,912  | 0.17%      |
| ## 3 | A3     | 54,531,554 | 54,433,752 | 99.82%     | 54,312,786  | 0.22%      |
| ## 4 | B1     | 48,959,732 | 48,860,008 | 99.8%      | 48,673,972  | 0.38%      |
| ## 5 | B2     | 43,290,206 | 43,196,540 | 99.78%     | 43,043,604  | 0.35%      |
| ## 6 | B3     | 53,719,508 | 53,620,804 | 99.82%     | 53,426,910  | 0.36%      |
| ## 7 | C1     | 47,846,408 | 47,770,716 | 99.84%     | 47,696,248  | 0.16%      |
| ## 8 | C2     | 53,227,284 | 53,144,582 | 99.84%     | 53,079,874  | 0.12%      |
| ## 9 | C3     | 55,158,816 | 55,056,522 | 99.81%     | 54,993,428  | 0.11%      |

**Table S4.** Mapping statistical results.

## Sample Name ALL Reads Mapped Reads Mapped Unique Reads Mapped Multi Reads

|      |    |            |            |            |            |
|------|----|------------|------------|------------|------------|
| ## 1 | A1 | 56,520,858 | 53,835,793 | 47,864,931 | 5,970,862  |
| ## 2 | A2 | 64,606,912 | 60,981,492 | 54,003,461 | 6,978,031  |
| ## 3 | A3 | 54,312,786 | 51,815,985 | 46,247,180 | 5,568,805  |
| ## 4 | B1 | 48,673,972 | 41,797,571 | 26,926,998 | 14,870,573 |
| ## 5 | B2 | 43,043,604 | 36,908,782 | 22,437,032 | 14,471,750 |
| ## 6 | B3 | 53,426,910 | 46,203,745 | 28,642,362 | 17,561,383 |
| ## 7 | C1 | 47,696,248 | 44,521,385 | 40,049,694 | 4,471,691  |
| ## 8 | C2 | 53,079,874 | 49,669,232 | 44,683,208 | 4,986,024  |
| ## 9 | C3 | 54,993,428 | 49,343,776 | 44,516,069 | 4,827,707  |

## Alignment Rate

|      |        |
|------|--------|
| ## 1 | 95.25% |
| ## 2 | 94.39% |
| ## 3 | 95.40% |
| ## 4 | 85.87% |
| ## 5 | 85.75% |
| ## 6 | 86.48% |
| ## 7 | 93.34% |
| ## 8 | 93.57% |
| ## 9 | 89.73% |



**Table S5.** GSEA of mouse intestinal organoids were subcultured for 14 days and added OA for 2 days, concentration 5  $\mu$ M; top 10 pathway with positive correlation with OA.

| NAME                                     | SIZE | ES             | NES       | NOM p-val | FDR q-val    | FWER p-val | RANK AT MAX | LEADING EDGE                           |
|------------------------------------------|------|----------------|-----------|-----------|--------------|------------|-------------|----------------------------------------|
| BIOCARTA_GCR_PATHWAY                     | 11   | 0.4945345<br>5 | 1.8651773 | 0         | 0.5586<br>52 | 0.416      | 4033        | tags=100%,<br>list=51%,<br>signal=202% |
| REACTOME_ARMS_MEDIATED_ACTIVATION        | 7    | 0.513226       | 1.7686964 | 0         | 1            | 0.705      | 2396        | tags=86%,<br>list=30%,<br>signal=122%  |
| REACTOME_MRNA_SPLICING_MINOR_PATHWAY     | 25   | 0.3164253<br>2 | 1.6650683 | 0         | 1            | 0.906      | 5455        | tags=100%,<br>list=68%,<br>signal=316% |
| PID_CXCR4_PATHWAY                        | 57   | 0.2002750<br>6 | 1.6257151 | 0         | 1            | 0.966      | 5231        | tags=89%,<br>list=66%,<br>signal=258%  |
| REACTOME_PROLONGED_ERK_ACTIVATION_EVENTS | 11   | 0.3507725      | 1.6213895 | 0         | 1            | 0.966      | 2396        | tags=73%,<br>list=30%,<br>signal=104%  |
| REACTOME_CTLA4_INHIBITORY_SIGNALING      | 8    | 0.4487565<br>5 | 1.5325488 | 0         | 1            | 1          | 4396        | tags=100%,<br>list=55%,<br>signal=223% |
| BIOCARTA_CDK5_PATHWAY                    | 11   | 0.2956204<br>4 | 1.5234358 | 0         | 1            | 1          | 350         | tags=27%,<br>list=4%,<br>signal=28%    |
| REACTOME_REGULATION_OF_IFNA_SIGNALING    | 10   | 0.3521357<br>8 | 1.5083532 | 0         | 1            | 1          | 5166        | tags=100%,<br>list=65%,<br>signal=284% |

|                                                                          |    |                |           |   |   |   |      |                                        |
|--------------------------------------------------------------------------|----|----------------|-----------|---|---|---|------|----------------------------------------|
| PID_P38_MKK3_6PATHWAY                                                    | 15 | 0.2594516<br>6 | 1.4905676 | 0 | 1 | 1 | 3988 | tags=80%,<br>list=50%,<br>signal=160%  |
| REACTOME_REGULATION_OF_L<br>OCALIZATION_OF_FOXO_TRANS<br>CRPTION_FACTORS | 6  | 0.494224       | 1.4875777 | 0 | 1 | 1 | 4033 | tags=100%,<br>list=51%,<br>signal=202% |

---

**Table S6.** GSEA of mouse intestinal organoids were subcultured for 14 days and added OA for 2 days, concentration 5  $\mu$ M; top 10 pathway with negative correlation with OA.

| NAME                                                          | SIZE | ES         | NES      | NOM p-val | FDR q-val | FWER p-val | RANK AT MAX | LEADING EDGE                          |
|---------------------------------------------------------------|------|------------|----------|-----------|-----------|------------|-------------|---------------------------------------|
| REACTOME_PRE_NOTCH_PROCESSING_IN_THE_ENDOPLASMIC_RETICULUM    | 5    | 0.62724227 | -2.09512 | 0         | 0.045     | 0          | 1960        | tags=80%,<br>list=25%,<br>signal=106% |
| KEGG_RIBOFLAVIN_METABOLISM                                    | 11   | 0.52075285 | -1.99508 | 0         | 0.088805  | 0.126      | 3009        | tags=82%,<br>list=38%,<br>signal=131% |
| REACTOME_DISEASES_OF_METABOLISM                               | 149  | 0.25797108 | -1.98037 | 0         | 0.074204  | 0.126      | 2285        | tags=44%,<br>list=29%,<br>signal=60%  |
| KEGG_DORSO_VENTRAL_AXIS_FORMATION                             | 14   | 0.44836396 | -1.93558 | 0         | 0.075496  | 0.126      | 2554        | tags=64%,<br>list=32%,<br>signal=94%  |
| REACTOME_METABOLISM_OF_VITAMINS_AND_COFACTORS                 | 120  | 0.28042835 | -1.93073 | 0         | 0.069397  | 0.126      | 2309        | tags=48%,<br>list=29%,<br>signal=66%  |
| REACTOME_ERBB2_ACTIVATES_PTAK6_SIGNALING                      | 5    | 0.61160076 | -1.85775 | 0         | 0.132711  | 0.342      | 1595        | tags=80%,<br>list=20%,<br>signal=100% |
| KEGG_GLYCOSPHINGOLIPID_BIOSYNTHESIS_LACTO_AND_NEOLACTO_SERIES | 9    | 0.53868747 | -1.85416 | 0         | 0.136956  | 0.399      | 3551        | tags=89%,<br>list=45%,<br>signal=160% |
| REACTOME_METABOLISM_OF_WATER_SOLUBLE_VITAMINS_AND_COFACTORS   | 78   | 0.33920977 | -1.83961 | 0         | 0.158573  | 0.514      | 2286        | tags=54%,<br>list=29%,<br>signal=75%  |

|                                  |    |                     |          |   |          |       |     |                                  |
|----------------------------------|----|---------------------|----------|---|----------|-------|-----|----------------------------------|
| REACTOME_ETHANOL_OXIDATI<br>ON   | 10 | -<br>0.4222583<br>2 | -1.78382 | 0 | 0.274716 | 0.756 | 590 | tags=40%, list=7%,<br>signal=43% |
| REACTOME_CREATINE_METABOL<br>ISM | 5  | -<br>0.6298837<br>7 | -1.76998 | 0 | 0.305683 | 0.756 | 479 | tags=60%, list=6%,<br>signal=64% |

---

**Table S7.** GSEA of mouse intestinal organoids were subcultured for 14 days and added CgTx for 2 days, concentration 4  $\mu$ M; top 10 pathway with positive correlation with CgTx.

| NAME                                                           | SI<br>ZE | ES             | NES           | NOM p-<br>val | FDR q-<br>val | FWER p-<br>val | RANK<br>AT MAX | LEADING EDGE                         |
|----------------------------------------------------------------|----------|----------------|---------------|---------------|---------------|----------------|----------------|--------------------------------------|
| PID_E2F_PATHWAY                                                | 21       | 0.382143<br>23 | 1.689671<br>4 | 0             | 1             | 0.52           | 318            | tags=33%,<br>list=11%,<br>signal=37% |
| REACTOME_DOWNREGULATION_<br>OF_TGF_BETA_RECEPTOR_SIGNALI<br>NG | 7        | 0.522608<br>8  | 1.689031<br>2 | 0             | 0.810934<br>3 | 0.618          | 353            | tags=57%,<br>list=12%,<br>signal=65% |
| REACTOME_RETINOID_CYCLE_DIS<br>EASE_EVENTS                     | 6        | 0.619673<br>25 | 1.644516      | 0             | 0.990886<br>3 | 0.948          | 191            | tags=50%,<br>list=6%,<br>signal=53%  |
| REACTOME_EGFR_DOWNREGULAT<br>ION                               | 5        | 0.564530<br>55 | 1.630244<br>6 | 0             | 0.884705<br>7 | 0.948          | 23             | tags=40%,<br>list=1%,<br>signal=40%  |
| REACTOME_TGF_BETA_RECEPTOR_<br>SIGNALING_ACTIVATES_SMADS       | 11       | 0.372055<br>95 | 1.626635      | 0             | 0.743485<br>3 | 0.948          | 353            | tags=36%,<br>list=12%,<br>signal=41% |
| KEGG_BUTANOATE_METABOLISM                                      | 13       | 0.368583<br>2  | 1.600098<br>4 | 0             | 0.808779<br>1 | 1              | 449            | tags=46%,<br>list=15%,<br>signal=54% |
| REACTOME_ABC_FAMILY_PROTEI<br>NS_MEDIATED_TRANSPORT            | 20       | 0.298912<br>4  | 1.553286<br>1 | 0             | 1             | 1              | 558            | tags=40%,<br>list=19%,<br>signal=49% |
| REACTOME_PEPTIDE_HORMONE_<br>METABOLISM                        | 19       | 0.423988<br>52 | 1.553087<br>1 | 0             | 1             | 1              | 318            | tags=37%,<br>list=11%,<br>signal=41% |

|                                                  |     |          |          |   |   |   |     |                                      |
|--------------------------------------------------|-----|----------|----------|---|---|---|-----|--------------------------------------|
| PID_TRKR_PATHWAY                                 | 20  | 0.342027 | 1.537472 | 0 | 1 | 1 | 245 | tags=30%,<br>list=8%,<br>signal=32%  |
| REACTOME_POST_TRANSLATIONAL_PROTEIN_MODIFICATION | 276 | 0.184759 | 1.496003 | 0 | 1 | 1 | 572 | tags=28%,<br>list=19%,<br>signal=31% |

**Table S8.** GSEA of mouse intestinal organoids were subcultured for 14 days and added CgTx for 2 days, concentration 4  $\mu$ M; top 10 pathway with negative correlation with CgTx.

| NAME                                                                                      | SIZE | ES          | NES       | NOM p-val | FDR q-val | FWER p-val | RANK AT MAX | LEADING EDGE                         |
|-------------------------------------------------------------------------------------------|------|-------------|-----------|-----------|-----------|------------|-------------|--------------------------------------|
| REACTOME_LONG_TERM_POTENTIATION                                                           | 7    | -0.6880439  | -1.783636 | 0         | 0.504974  | 0.235      | 175         | tags=57%,<br>list=6%,<br>signal=61%  |
| REACTOME_CREB1_PHOSPHORYLATION_THROUGH_NMDA_RECEPTOR_MEDIATED_ACTIVATION_OF_RAS_SIGNALING | 6    | -0.67519295 | -1.781969 | 0         | 0.2973932 | 0.285      | 94          | tags=50%,<br>list=3%,<br>signal=52%  |
| REACTOME_UNBLOCKING_OF_NMDA_RECEPTORS_Glutamate_BINDING_AND_ACTIVATION                    | 6    | -0.66089743 | -1.779965 | 0         | 0.2149289 | 0.285      | 107         | tags=50%,<br>list=4%,<br>signal=52%  |
| KEGG_PYRIMIDINE_METABOLISM                                                                | 12   | -0.5398126  | -1.698    | 0         | 0.3687008 | 0.715      | 564         | tags=58%,<br>list=19%,<br>signal=72% |
| BIOCARTA_EXTRINSIC_PATHWAY                                                                | 5    | -0.5875213  | -1.674801 | 0         | 0.4591327 | 0.827      | 259         | tags=60%,<br>list=9%,<br>signal=66%  |

|                                                  |    |                     |                   |               |           |       |     |                                      |
|--------------------------------------------------|----|---------------------|-------------------|---------------|-----------|-------|-----|--------------------------------------|
| KEGG_REGULATION_OF_ACTIN_CYTOSKELETON            | 45 | -<br>0.30843<br>64  | -<br>1.59794<br>1 | 0             | 0.8610355 | 0.937 | 350 | tags=29%,<br>list=12%,<br>signal=32% |
| KEGG_NICOTINATE_AND_NICOTINAMIDE_METABOLISM      | 11 | -<br>0.39029<br>14  | -<br>1.58532<br>4 | 0             | 0.8484871 | 1     | 369 | tags=36%,<br>list=12%,<br>signal=41% |
| REACTOME_COMMON_PATHWAY_OF_FIBRIN_CLOT_FORMATION | 12 | -<br>0.44068<br>59  | -<br>1.56492      | 0.20078<br>74 | 0.9533182 | 1     | 338 | tags=42%,<br>list=11%,<br>signal=47% |
| KEGG_GLYCEROLIPID_METABOLISM                     | 15 | -<br>0.35926<br>643 | -<br>1.55060<br>1 | 0.11656<br>44 | 1         | 1     | 330 | tags=33%,<br>list=11%,<br>signal=37% |
| PID_FCER1_PATHWAY                                | 9  | -<br>0.45894<br>766 | -<br>1.54193<br>2 | 0             | 1         | 1     | 779 | tags=56%,<br>list=26%,<br>signal=75% |

---
